# Supplementary material
Source: MDPI journal article supplement (https://www.mdpi.com/2073-4395/13/9/2199)
Supplement: s1 [file s1]

# The Influence of Climatic Conditions and Agronomic Practices on Greenhouse Gas Emissions in a Conventional Vineyard (DOCa. Rioja, Spain)

Estíbaliz Rodrigo García, Rebeca Murillo Peña, Eva Pilar Pérez Álvarez, Teresa Garde Cerdán and José María Martínez Vidaurre

SUPPLEMENTARY MATERIALS:

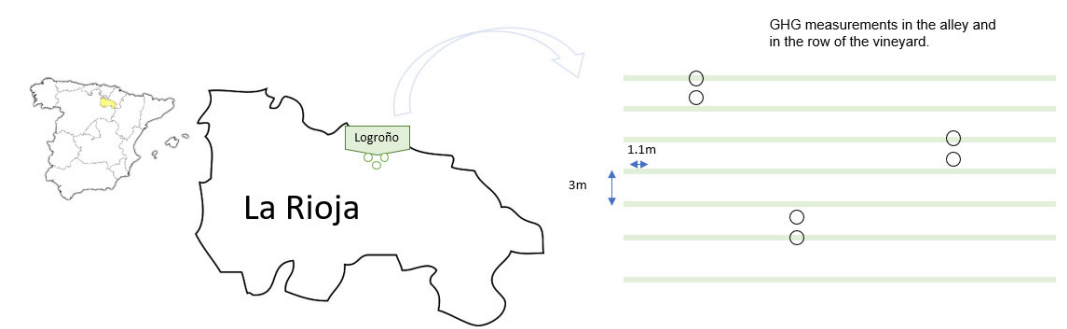

**Figure S1.** Location of the study plot and experimental design based on rings placed both in the vineyard alleys and rows.

**Table S1.** Agricultural operations carried out in 2017, 2018, and 2019 in the experimental plot.

| Year | Date           | Agricultural Operations |                | Treatment              |
|------|----------------|-------------------------|----------------|------------------------|
| 2017 | May 02-05      | Mineral Fertilization   | NPK (10-0-5)   | 300 kg/ha              |
|      | May 09         | Tillage                 |                |                        |
|      | July 03-07     | Irrigation              |                | 130 m <sup>3</sup> /ha |
|      | July 20        | Irrigation              |                | 130 m <sup>3</sup> /ha |
|      | November 24    | Manure + tillage        |                | 15,000 kg/ha           |
| 2018 | February 15    | Pruning                 |                |                        |
|      | March 1-2      | Tillage                 |                |                        |
|      | April 07       | Mineral Fertilization   | NPK (15-15-15) | 300 kg/ha              |
|      | April 26-30    | Digging rows            |                |                        |
|      | May 20         | Tillage                 |                |                        |
| 2019 | November 10    | Pruning                 |                |                        |
|      | February 25-28 | Digging rows            |                |                        |
|      | March 04-07    | Mineral Fertilization   | NPK (15-15-19) | 300 kg/ha              |
|      | March 20       | Tillage                 |                |                        |
|      | July 03        | Tillage                 |                |                        |
|      | July 14-16     | Irrigation              |                | 130 m <sup>3</sup> /ha |
|      | September 15   | Tillage                 |                |                        |

**Table S2.** Cumulative emissions and minimum and maximum ranges of CO<sub>2</sub> (kg ha<sup>-1</sup>), N<sub>2</sub>O (g ha<sup>-1</sup>), and CH<sub>4</sub> (g ha<sup>-1</sup>) for the 2017, 2018, and 2019 measurement years in the alleys and rows.

| Year |       | CO <sub>2</sub> Emission rate (kg ha <sup>-1</sup> day <sup>-1</sup> ) |      |       | N <sub>2</sub> O Emission rate (g ha <sup>-1</sup> day <sup>-1</sup> ) |       |      | CH <sub>4</sub> Emission rate (g ha <sup>-1</sup> day <sup>-1</sup> ) |        |       |
|------|-------|------------------------------------------------------------------------|------|-------|------------------------------------------------------------------------|-------|------|-----------------------------------------------------------------------|--------|-------|
|      |       | Cum.                                                                   | Min. | Max.  | Cum.                                                                   | Min.  | Max. | Cum.                                                                  | Min.   | Max.  |
| 2017 | Alley | 295.8±12.1                                                             | 3.4  | 47.6  | 28.0±5.1                                                               | -7.6  | 16.2 | -138.9±48.1                                                           | -7.6   | 16.2  |
|      | Row   | 322.0±11.2                                                             | 5.4  | 47.4  | 44.9±5.4                                                               | -3.7  | 16.6 | 4.1±56.3                                                              | -59.8  | 184.6 |
| 2018 | Alley | 934.7±66.5                                                             | 21.6 | 268.8 | 122.6±13.3                                                             | -2.7  | 41.2 | 215.5±51.0                                                            | -70.1  | 41.2  |
|      | Row   | 926.8±76.5                                                             | 13.1 | 301.7 | 168.4±17.4                                                             | 0.2   | 53.9 | 238.4±54.9                                                            | -101.4 | 115.1 |
| 2019 | Alley | 232.7±13.9                                                             | 4.6  | 44.3  | 152.9±18.2                                                             | -12.7 | 41.2 | -153.2±17.6                                                           | -64.9  | -1.8  |
|      | Row   | 223.0±16.7                                                             | 2.3  | 52.5  | 181.0±19.9                                                             | -14.1 | 42.7 | -155.8±27.2                                                           | -88.2  | 24.3  |

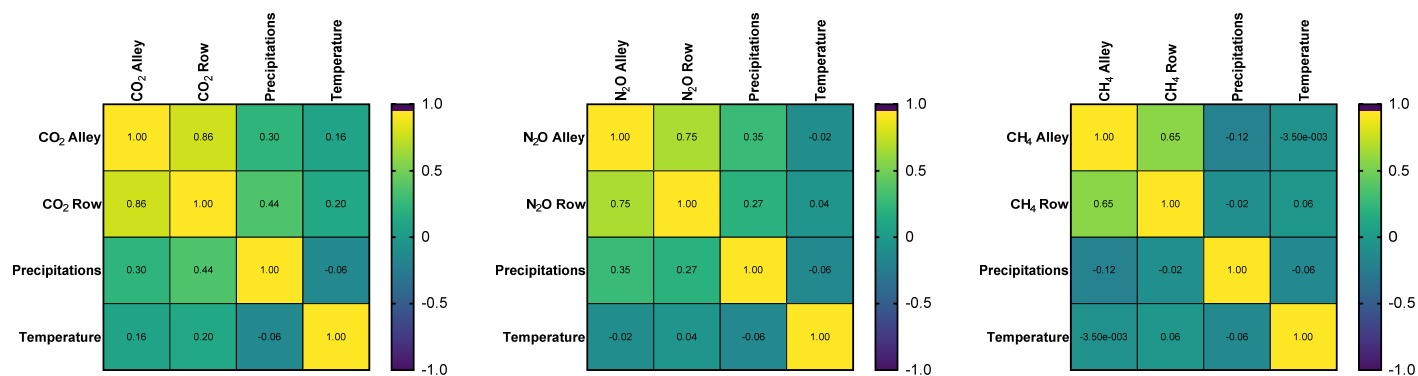

**Figure S2.** Spearman's rank correlation coefficients (rs) of the analysis between precipitation volumes before measurement and temperatures for CO<sub>2</sub>, N<sub>2</sub>O, and CH<sub>4</sub> in 2017, 2018, and 2019.
